# Supplementary material for: Labile carbon release from oxic–anoxic cycling in woodchip bioreactors enhances nitrate removal without increasing nitrous oxide accumulation
Source: Royal Society of Chemistry journal article supplement (doi:10.1039/d1ew00446h), 2021-01-01
Supplement: d1ew00446h1.pdf [file d1ew00446h1.pdf]

Supporting Information

**Labile Carbon Release from Oxic-Anoxic Cycling in Woodchip Bioreactors Enhances  
Nitrate Reduction without Increasing Nitrous Oxide Accumulation**

Philip M. McGuire<sup>†</sup>, Valentina Dai<sup>†</sup>, M. Todd Walter<sup>§</sup>, and Matthew C. Reid<sup>†\*</sup>

<sup>†</sup>School of Civil and Environmental Engineering, Cornell University, Ithaca NY 14853, USA

<sup>§</sup>Department of Biological and Environmental Engineering, Cornell University, Ithaca, NY  
14853, USA

Number of Pages: 34

Number of Tables: 3

Number of Figures: 28

## Summary

|                                                            |     |
|------------------------------------------------------------|-----|
| <b>Materials and Methods.....</b>                          |     |
| High Frequency Carbon Chemistry Statistical Analysis ..... | S32 |

### Tables

|                                                                                         |     |
|-----------------------------------------------------------------------------------------|-----|
| Table S1: Trace Element Solution Composition .....                                      | S6  |
| Table S2: Compiled Hydraulic Parameters from Flowthrough Experiments .....              | S11 |
| Table S3: High Frequency Carbon Chemistry Statistical Analysis – Reported p-values..... | S34 |

### Figures.....

|                                                                       |     |
|-----------------------------------------------------------------------|-----|
| Figure S1: Reactor Schematics .....                                   | S3  |
| Figure S2: Reactor Image .....                                        | S4  |
| Figure S3: Reactor Operation Schedule.....                            | S5  |
| Figure S4: Experiment 1 CS Reactor Bromide Tracer Test Results .....  | S7  |
| Figure S5: Experiment 1 DRW Reactor Bromide Tracer Test Results ..... | S8  |
| Figure S6: Experiment 2 CS Reactor Bromide Tracer Test Results .....  | S9  |
| Figure S7: Experiment 2 DRW Reactor Bromide Tracer Test Results ..... | S10 |
| Figure S8: Experiment 1 CS Upstream DO Concentrations.....            | S12 |
| Figure S9: Experiment 1 CS Downstream DO Concentrations .....         | S13 |
| Figure S10: Experiment 2 CS Upstream DO Concentrations .....          | S14 |
| Figure S11: Experiment 2 CS Downstream DO Concentrations .....        | S15 |
| Figure S12: Experiment 1 DRW Upstream DO Concentrations .....         | S16 |
| Figure S13: Experiment 1 DRW Downstream DO Concentrations .....       | S17 |
| Figure S14: Experiment 2 DRW Upstream DO Concentrations .....         | S18 |
| Figure S15: Experiment 2 Upstream Nitrous Oxide Yields .....          | S19 |
| Figure S16: Experiment 1 Upstream Nitrous Oxide Yields .....          | S20 |
| Figure S17: Experiment 2 CS Carbon Profiles.....                      | S21 |
| Figure S18: Experiment 1 CS DOC Profiles .....                        | S22 |
| Figure S19: Experiment 2 DRW Carbon Profiles .....                    | S23 |
| Figure S20: Experiment 1 DRW DOC Profiles .....                       | S24 |
| Figure S21: Extended High Frequency Dissolved Oxygen Profiles.....    | S25 |
| Figure S22: Extended High Frequency Nitrate Removal Rates .....       | S26 |
| Figure S23: Extended High Frequency Nitrous Oxide Yields .....        | S27 |
| Figure S24: Extended High Frequency DIC Shifts .....                  | S28 |
| Figure S25: High Frequency Nitrate and DOC Correlation .....          | S29 |
| Figure S26: High Frequency DIC and DOC Correlation.....               | S30 |
| Figure S27: High Frequency DOC Concentrations .....                   | S31 |
| Figure S28: High Frequency DIC Shifts.....                            | S33 |

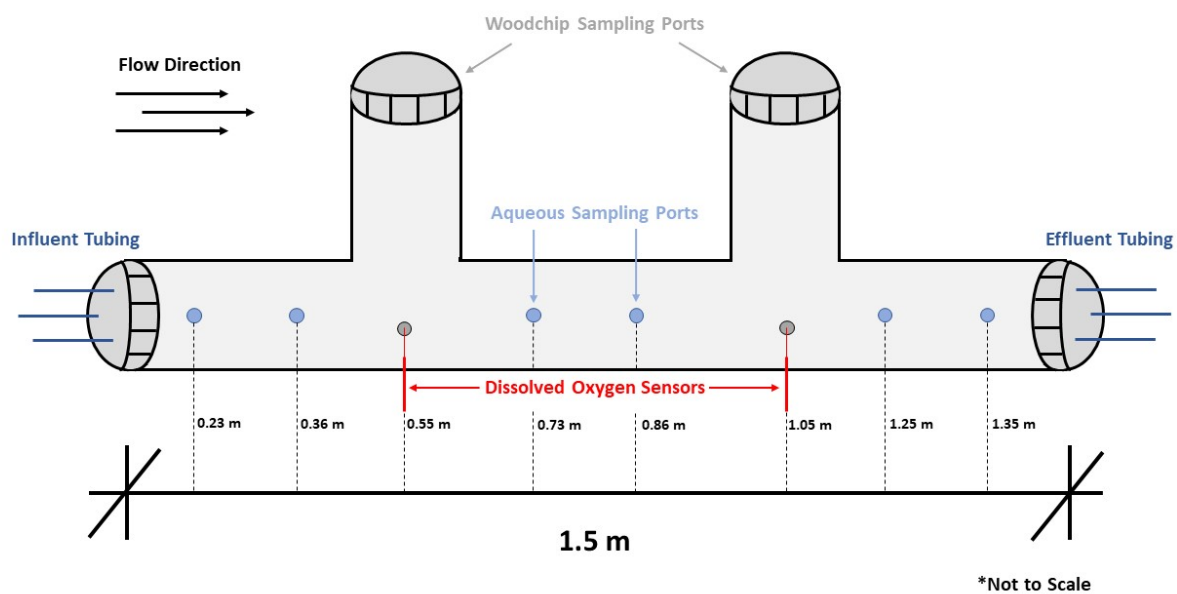

Figure S1: Schematic of a single flow-through reactor.

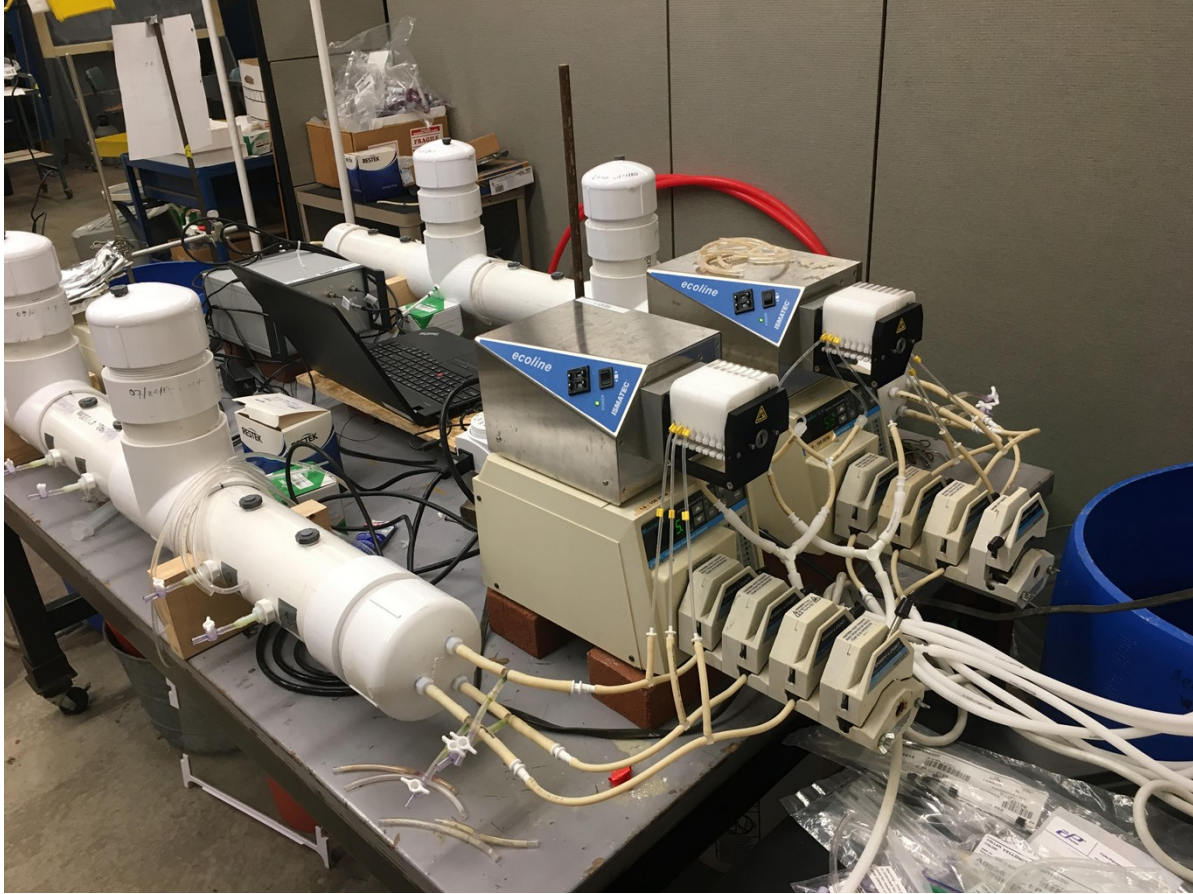

Figure S2: Image of laboratory flow-through reactor. Peristaltic pumps for flow control are seen in the foreground. Reactor sampling ports can be visualized on the left-side of the reactor seen in the left-hand side of the photograph. Dissolved oxygen probes are located at the junction of the reactor barrel and woodchip sampling ports. In this photograph, flow through the reactors proceeds from the lower right to the upper left.

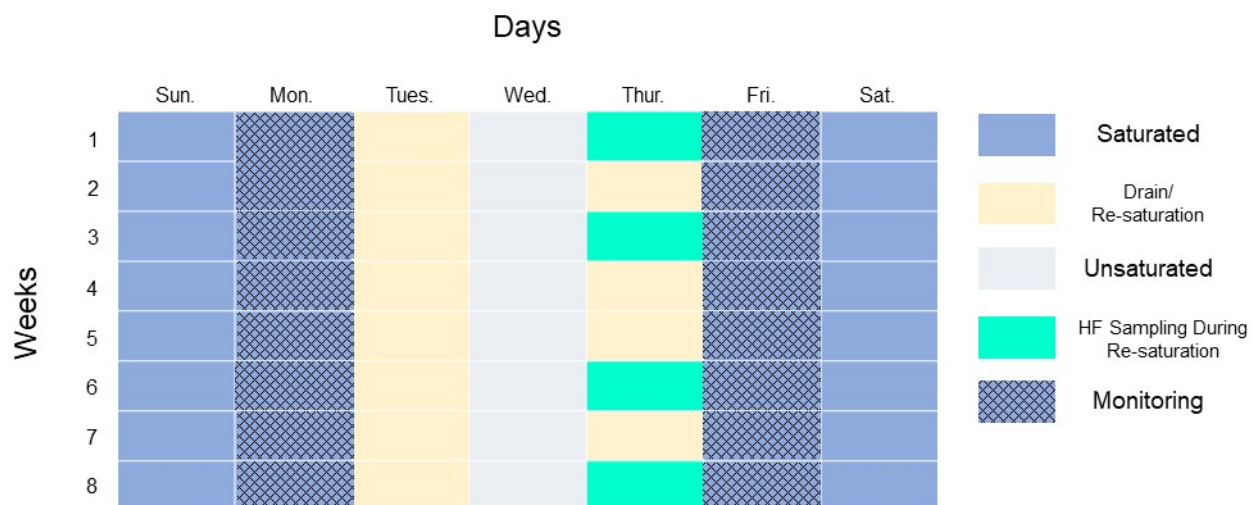

Figure S3: Schedule of reactor operation and sampling for drying-rewetting reactors. Reactors were drained weekly on Tuesday and re-saturated on Thursday. A similar porewater chemistry monitoring schedule was kept for the continuously saturated reactors. In Experiment 1, this schedule was truncated during Week 5.

**Table S1: Trace Element Solution Composition**

| Solution                                                            | Chemical Reagents                     | 1000X Stock Solution (g/L) |
|---------------------------------------------------------------------|---------------------------------------|----------------------------|
| Trace Element Solution I<br>(0.1 M H <sub>2</sub> SO <sub>4</sub> ) | NiCl <sub>2</sub> •6H <sub>2</sub> O  | 0.020                      |
|                                                                     | CoCl <sub>2</sub> •6H <sub>2</sub> O  | 0.010                      |
|                                                                     | ZnSO <sub>4</sub> •7H <sub>2</sub> O  | 0.100                      |
|                                                                     | MnSO <sub>4</sub> •7H <sub>2</sub> O  | 2.319                      |
| Trace Element Solution II<br>(0.1 M NaOH)                           | H <sub>3</sub> BO <sub>3</sub>        | 0.300                      |
|                                                                     | NaMoO <sub>4</sub> •2H <sub>2</sub> O | 0.030                      |

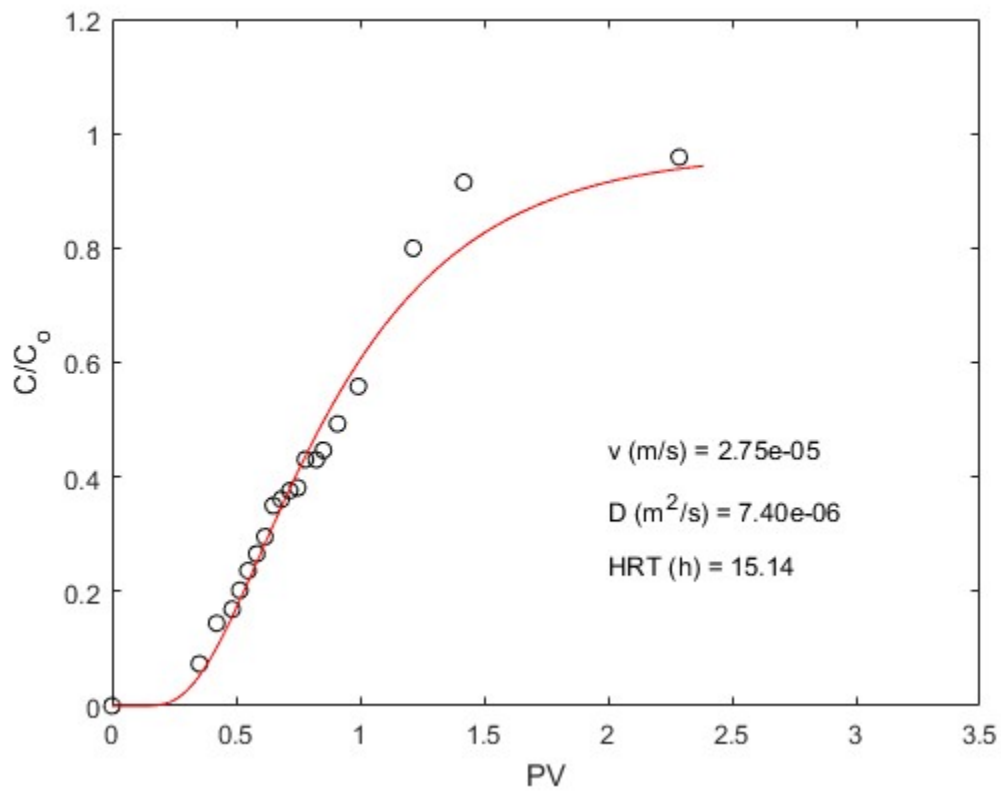

Figure S4: Bromide tracer test results from Experiment 1 continuously saturated reactor. Breakthrough curve was modeled using a 1-dimensional advection-dispersion equation implemented in MATLAB.

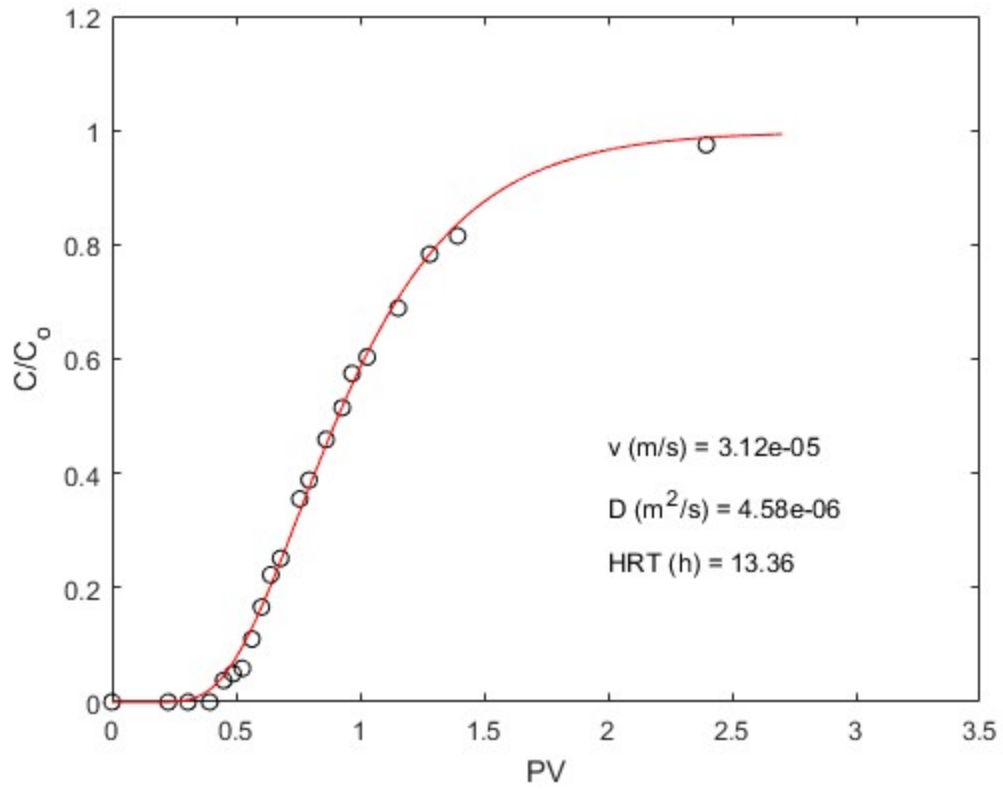

Figure S5: Bromide tracer test results from Experiment 1 drying-rewetting reactor. Breakthrough curve was modeled using a 1-dimensional advection-dispersion equation implemented in MATLAB.

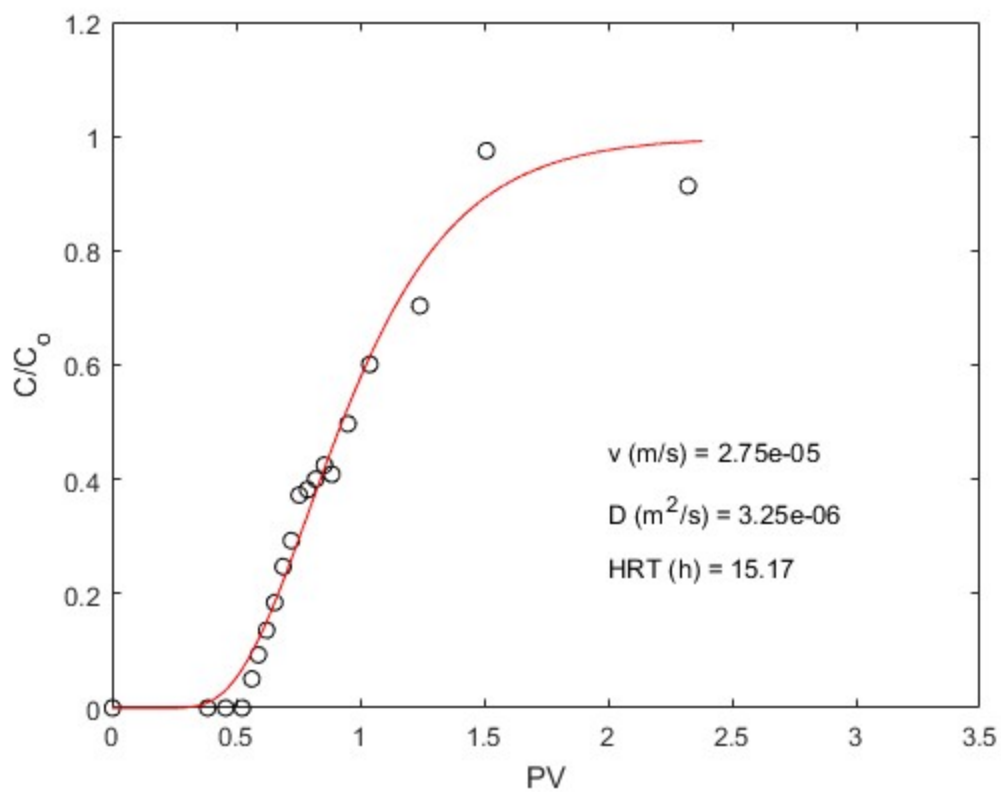

Figure S6: Bromide tracer test results from Experiment 2 continuously saturated reactor. Breakthrough curve was modeled using a 1-dimensional advection-dispersion equation implemented in MATLAB.

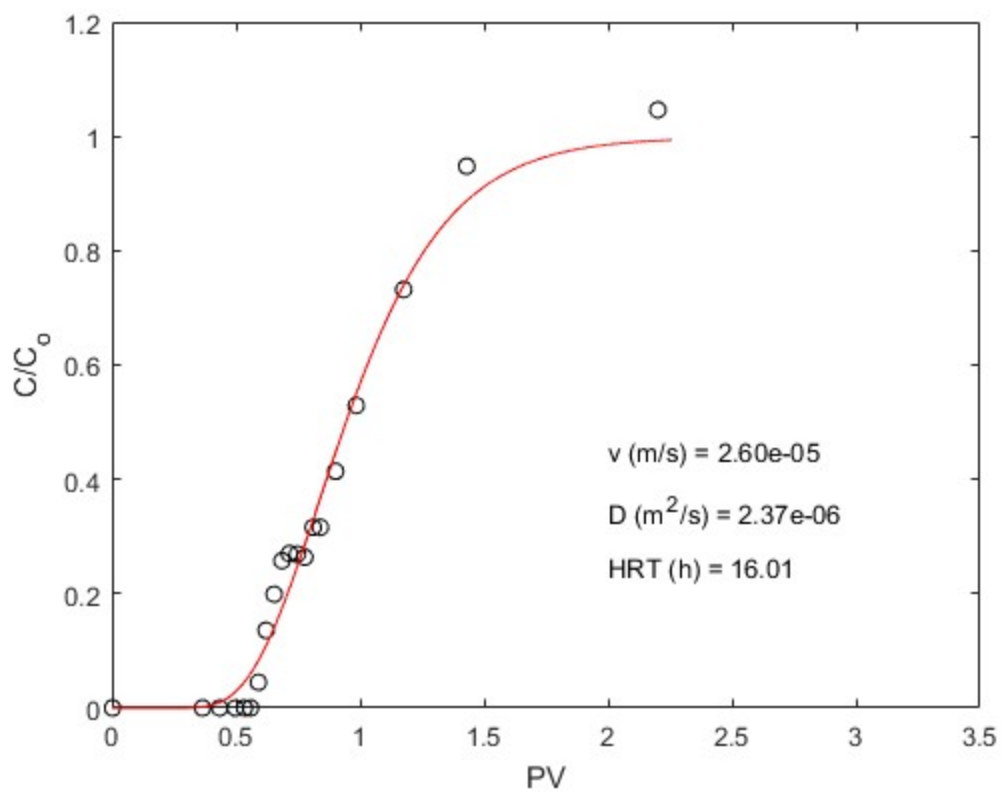

Figure S7: Bromide tracer test results from Experiment 2 drying-rewetting reactor. Breakthrough curve was modeled using a 1-dimensional advection-dispersion equation implemented in MATLAB.

**Table S2: Compiled Hydraulic Parameters from Flowthrough Experiments**

| <b>Experiment</b> | <b>Reactor Hydraulic Regime</b> | <b>MRT (h)</b> | <b>Porewater Velocity (m/s)</b> | <b>Dispersion (m<sup>2</sup>/s)</b> | <b>Peclet Number</b> |
|-------------------|---------------------------------|----------------|---------------------------------|-------------------------------------|----------------------|
| Experiment 1      | Continuously Saturated (CS)     | 15.1           | $2.8 \times 10^{-5}$            | $7.4 \times 10^{-6}$                | 5.68                 |
|                   | Drying-Rewetting (DRW)          | 13.4           | $3.1 \times 10^{-5}$            | $4.58 \times 10^{-6}$               | 10.2                 |
| Experiment 2      | Continuously Saturated (CS)     | 15.2           | $2.8 \times 10^{-5}$            | $3.25 \times 10^{-6}$               | 12.9                 |
|                   | Drying-Rewetting (DRW)          | 16.0           | $2.6 \times 10^{-5}$            | $2.37 \times 10^{-6}$               | 16.5                 |

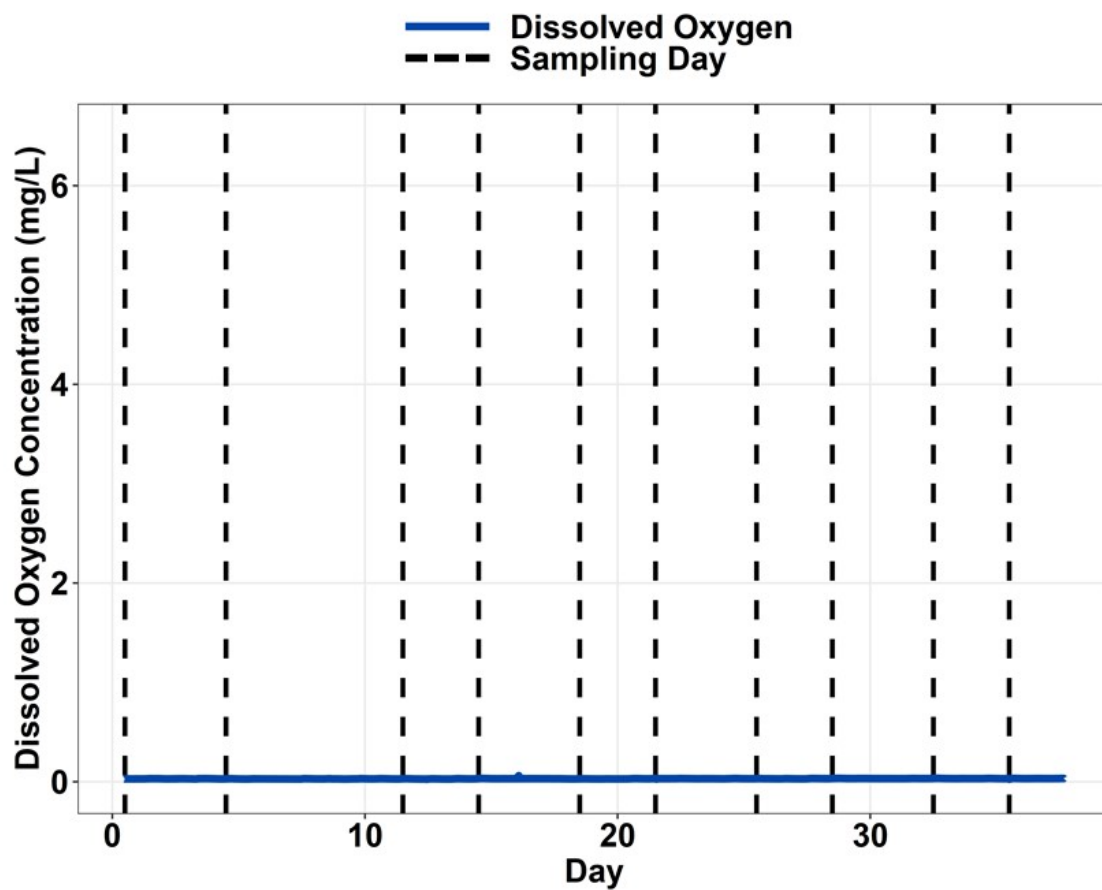

Figure S8: Dissolved oxygen concentrations from Experiment 1 at the upstream location of the continuously saturated reactor. Sampling days are indicated by vertical dashed lines.

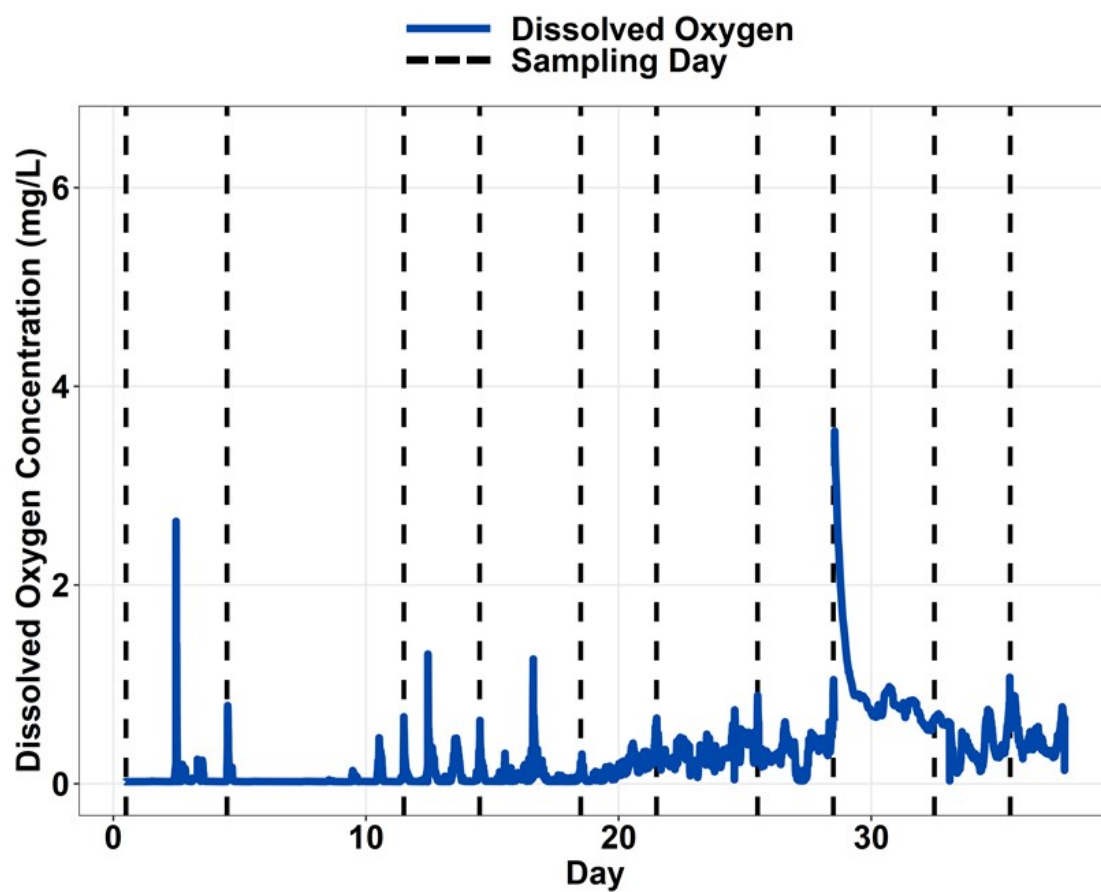

Figure S9: Dissolved oxygen concentrations from Experiment 1 at the downstream location of the continuously saturated reactor. Sampling days are indicated by vertical dashed lines.

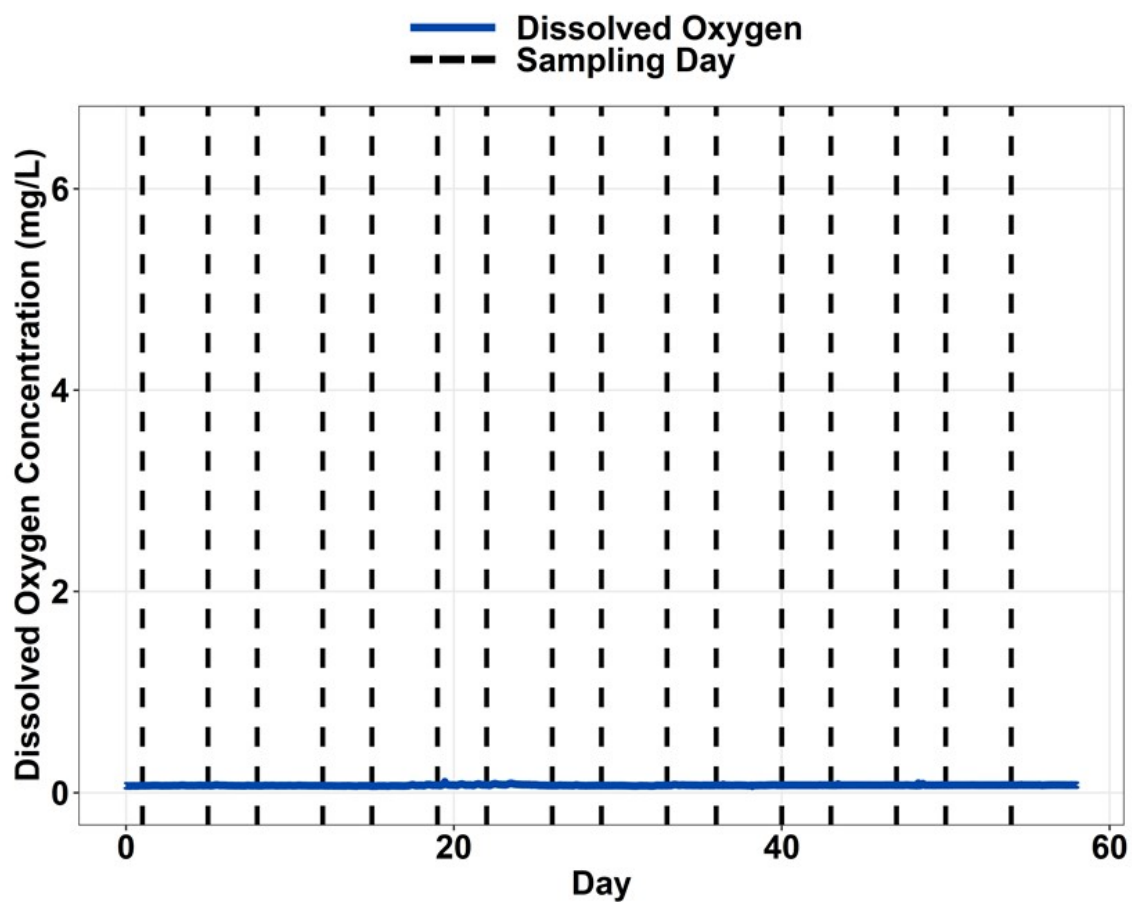

Figure S10: Dissolved oxygen concentrations from Experiment 2 at the upstream location of the continuously saturated reactor. Sampling days are indicated by vertical dashed lines.

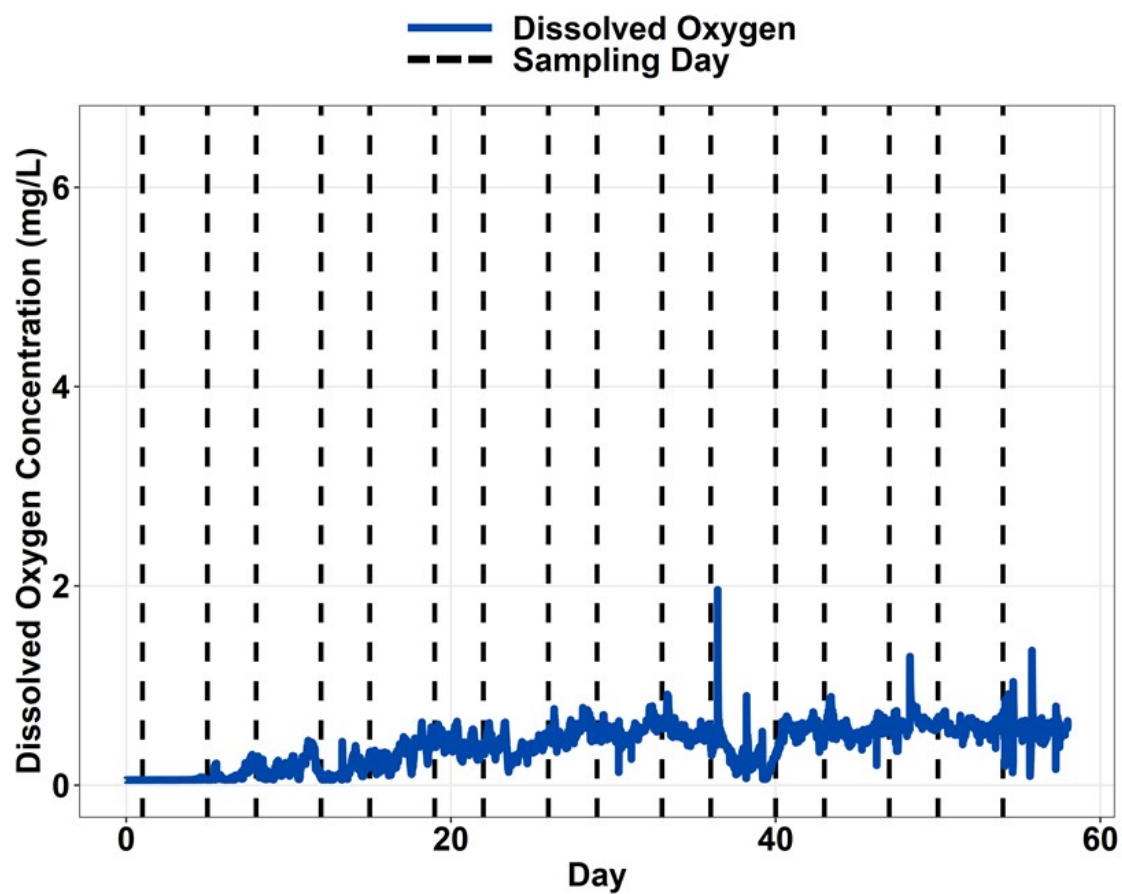

Figure S11: Dissolved oxygen concentrations from Experiment 2 at the downstream location of the continuously saturated reactor. Sampling days are indicated by vertical dashed lines.

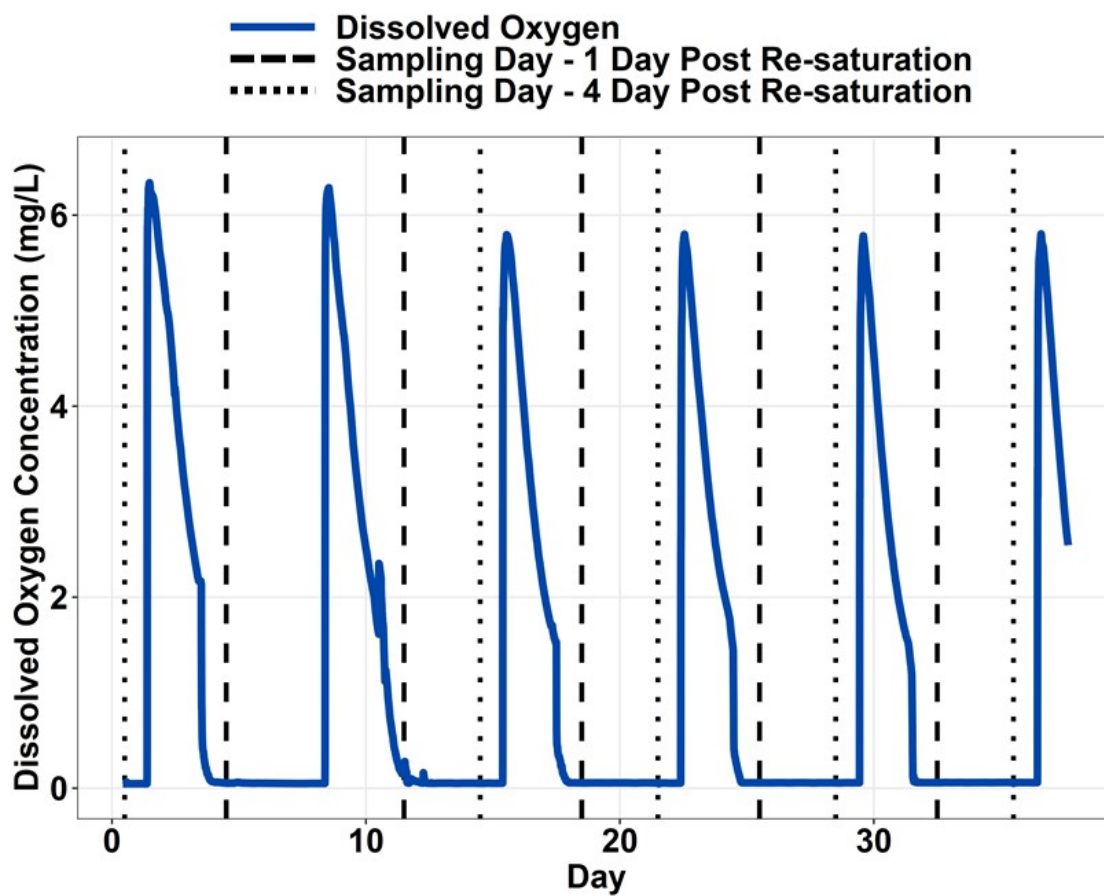

S12: Dissolved oxygen concentrations from Experiment 1 at the upstream location of the drying-rewetting reactor. Sampling days are indicated by vertical dashed or dotted lines.

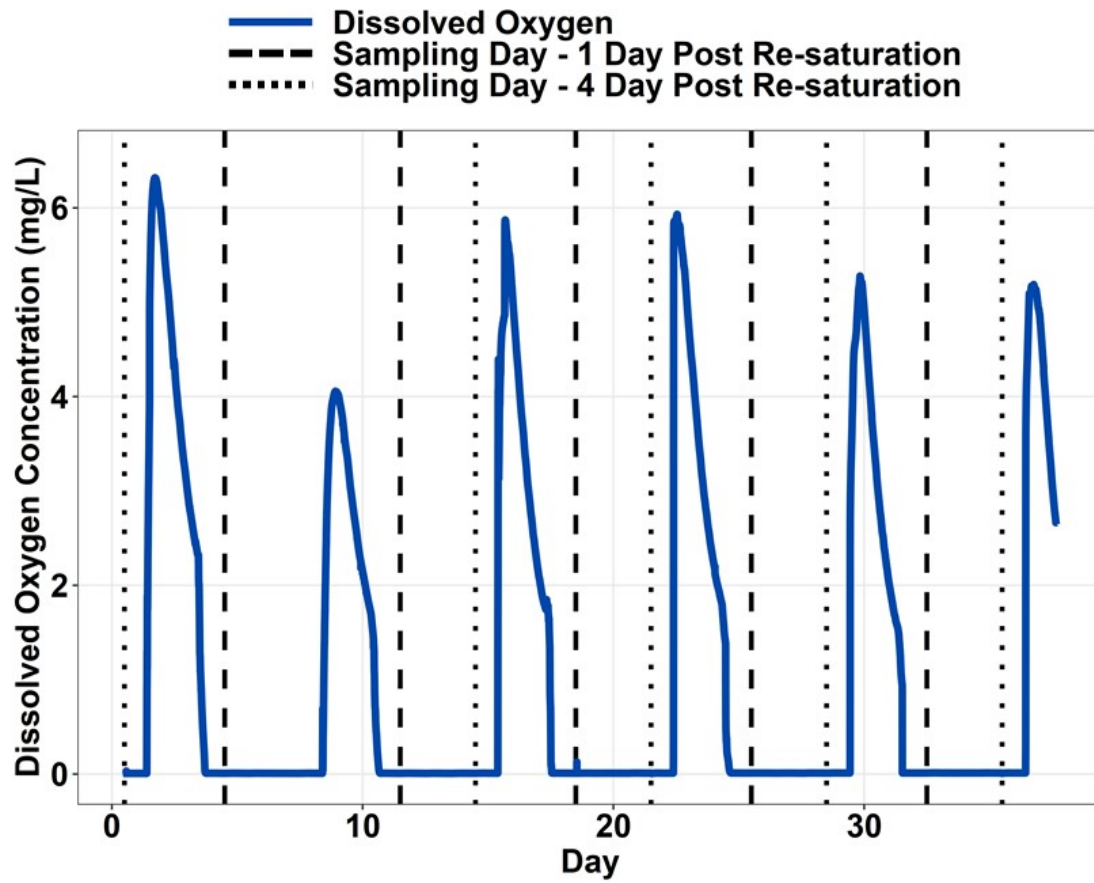

S13: Dissolved oxygen concentrations from Experiment 1 at the downstream location of the drying-rewetting reactor. Sampling days are indicated by vertical dashed or dotted lines.

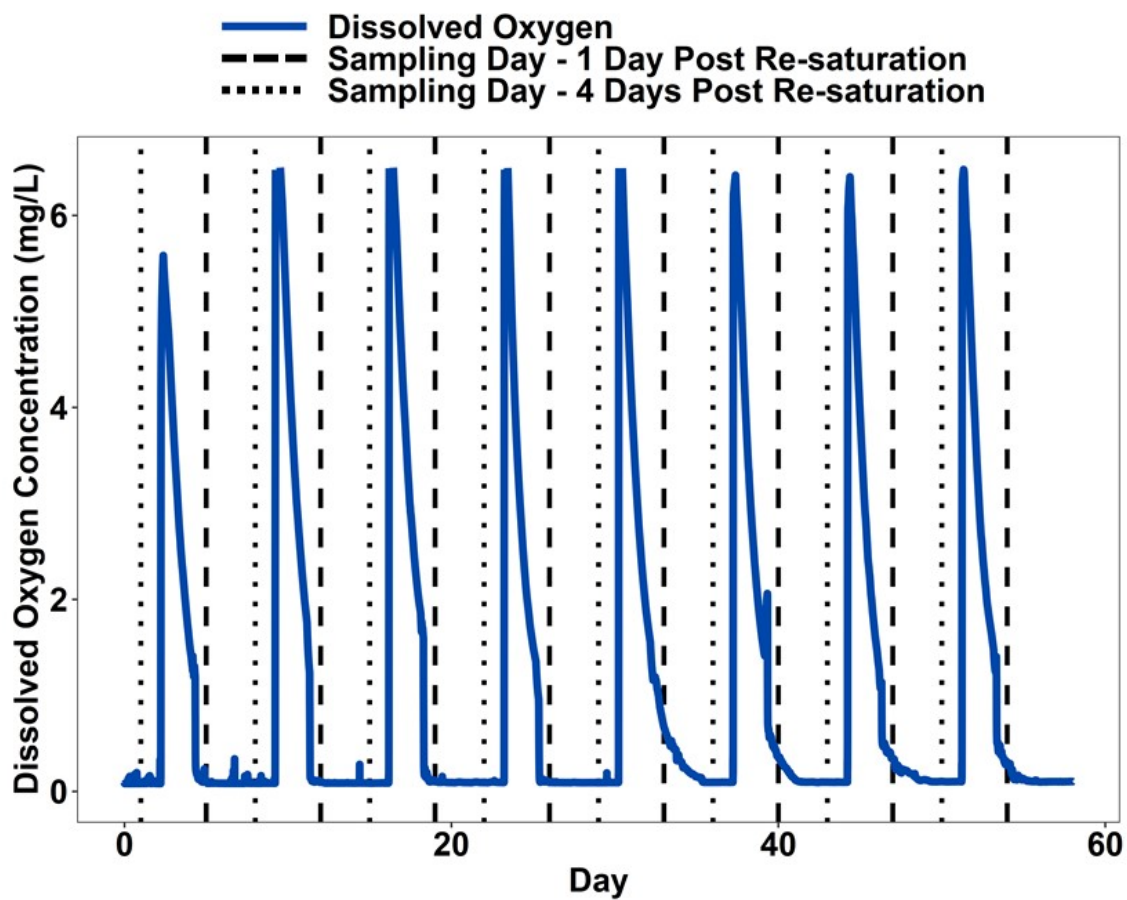

S14: Dissolved oxygen concentrations from Experiment 2 at the upstream location of the drying-rewetting reactor. Sampling days are indicated by vertical dashed or dotted lines.

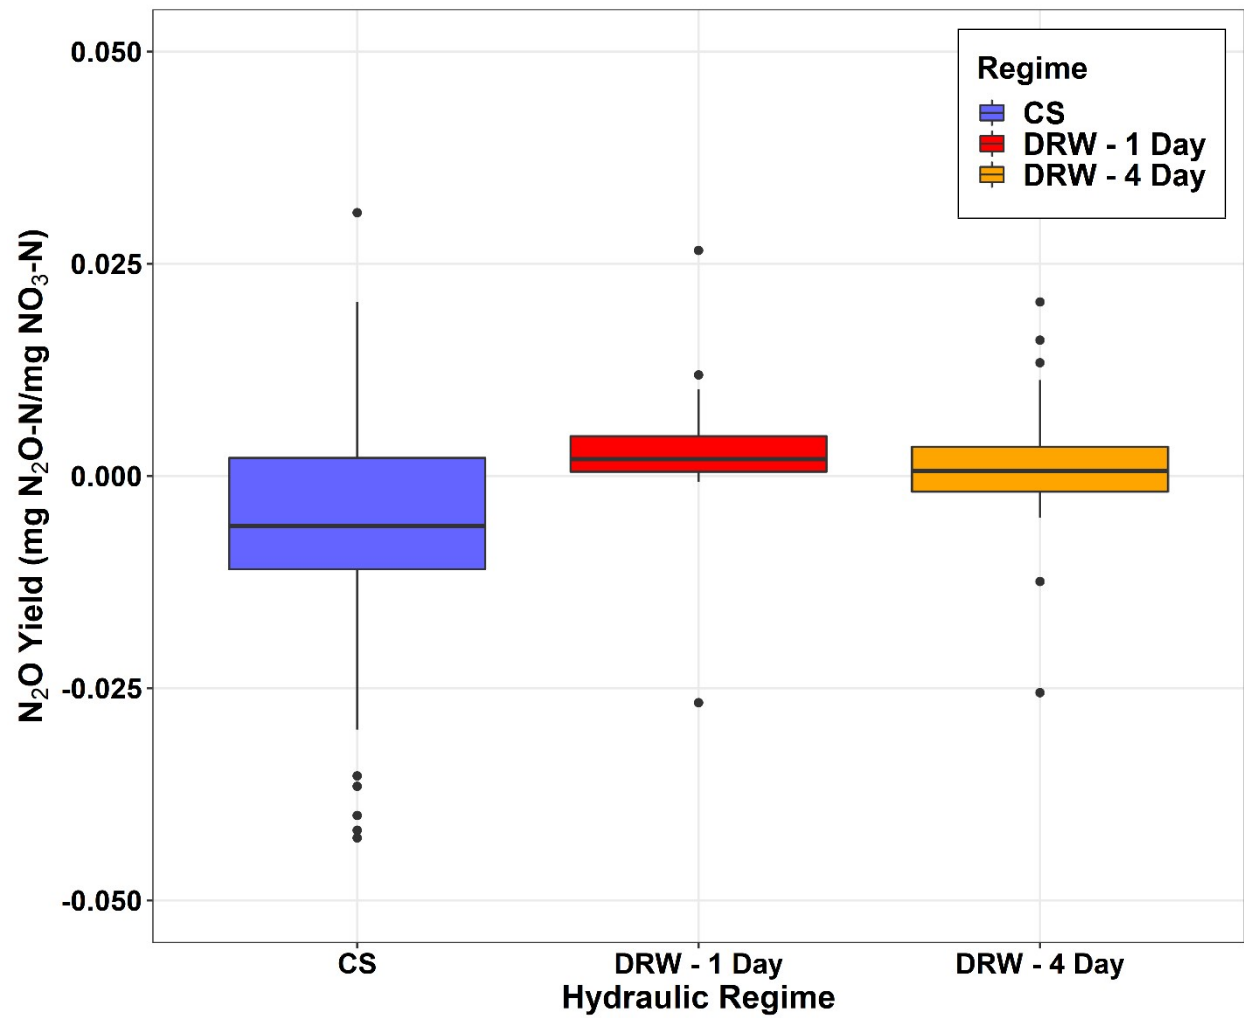

Figure S15: Effective  $N_2O$  yields from Experiment 2 in upstream sampling ports (ports located at 0.23, 0.36, and 0.55 m), as defined in Eq. 3. 15 datapoints are not shown for exceeding the y-axis limits.

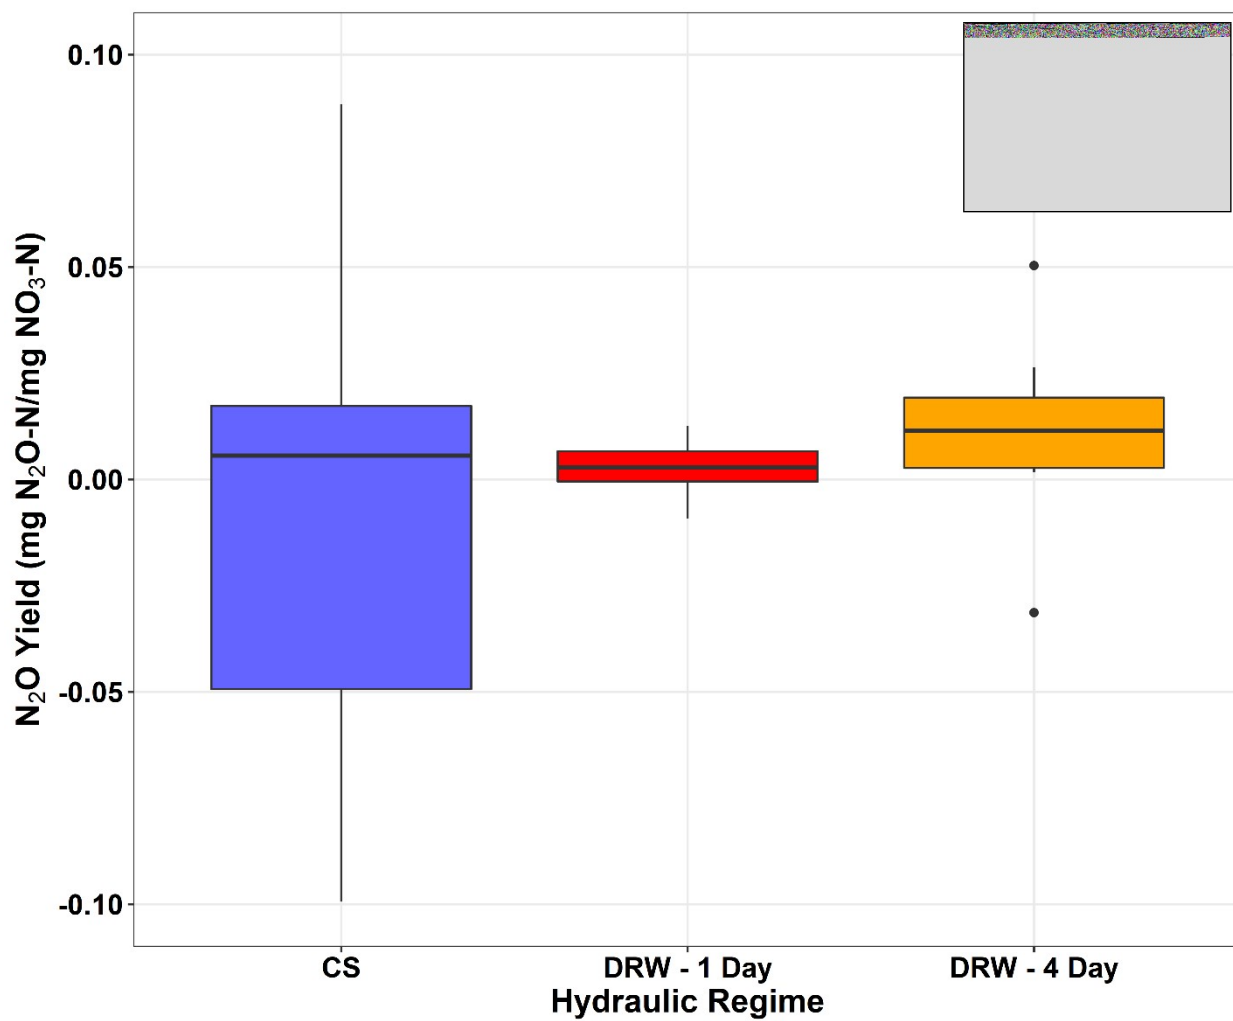

Figure S16: Effective  $N_2O$  yields from Experiment 1 in upstream sampling ports (ports located at 0.23, 0.36, and 0.55 m), as defined in Eq. 3. 9 datapoints are not shown for exceeding the y-axis limits.

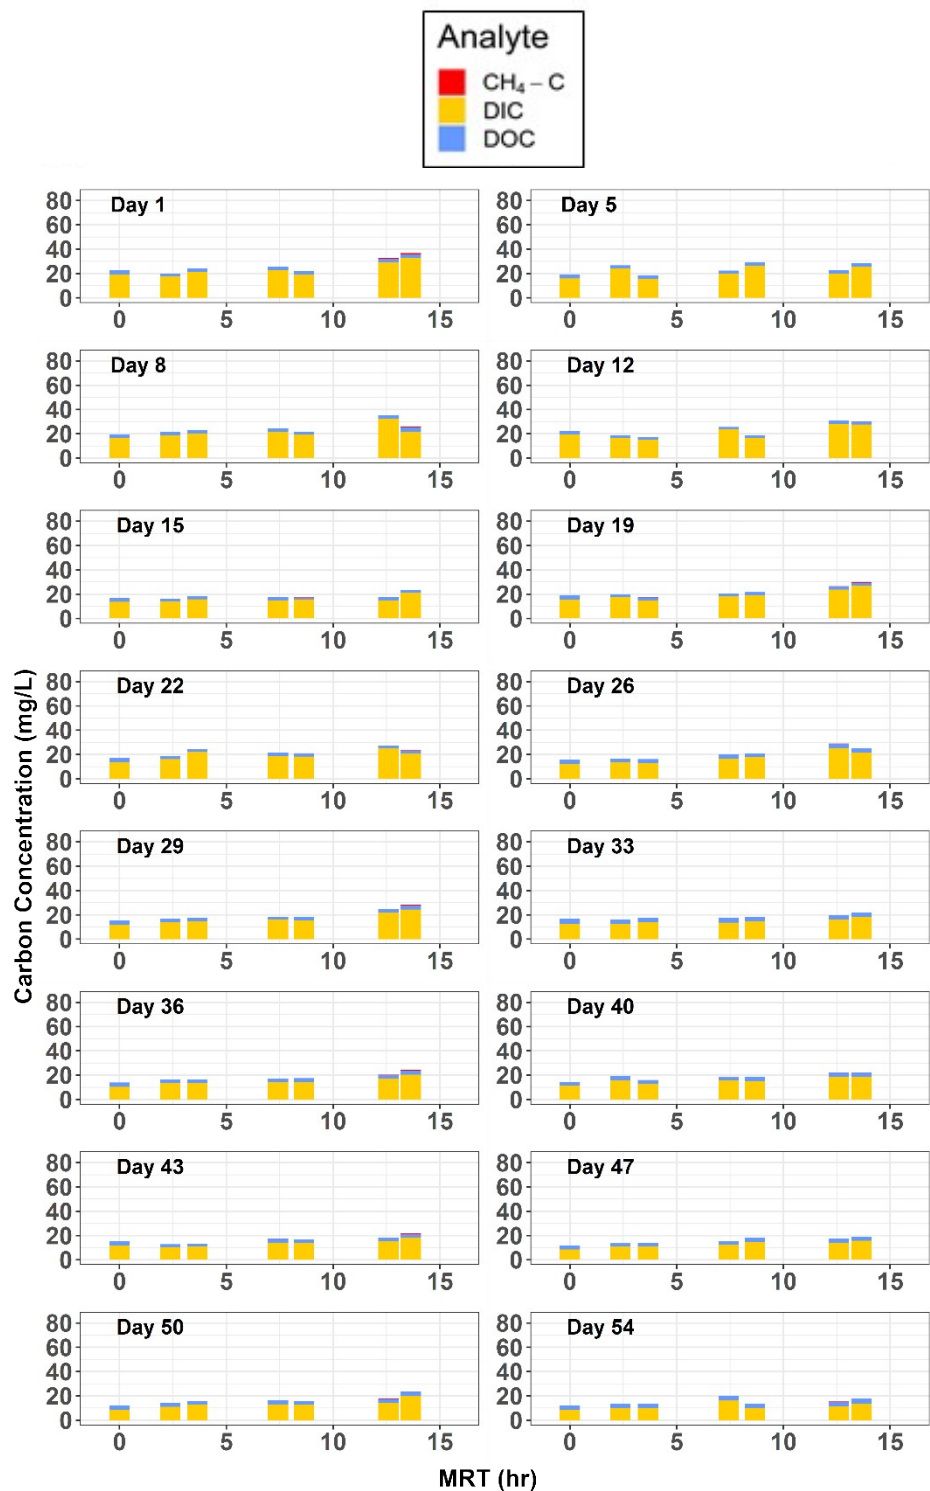

Figure S17: Profiles of methane (CH<sub>4</sub>-C), dissolved inorganic carbon (DIC), and dissolved organic carbon (DOC) in continuously saturated (CS) reactor from Experiment 2. Each bar represents a discrete water sampling port, with mean residence time (MRT) determined as length along the reactor/porewater velocity.

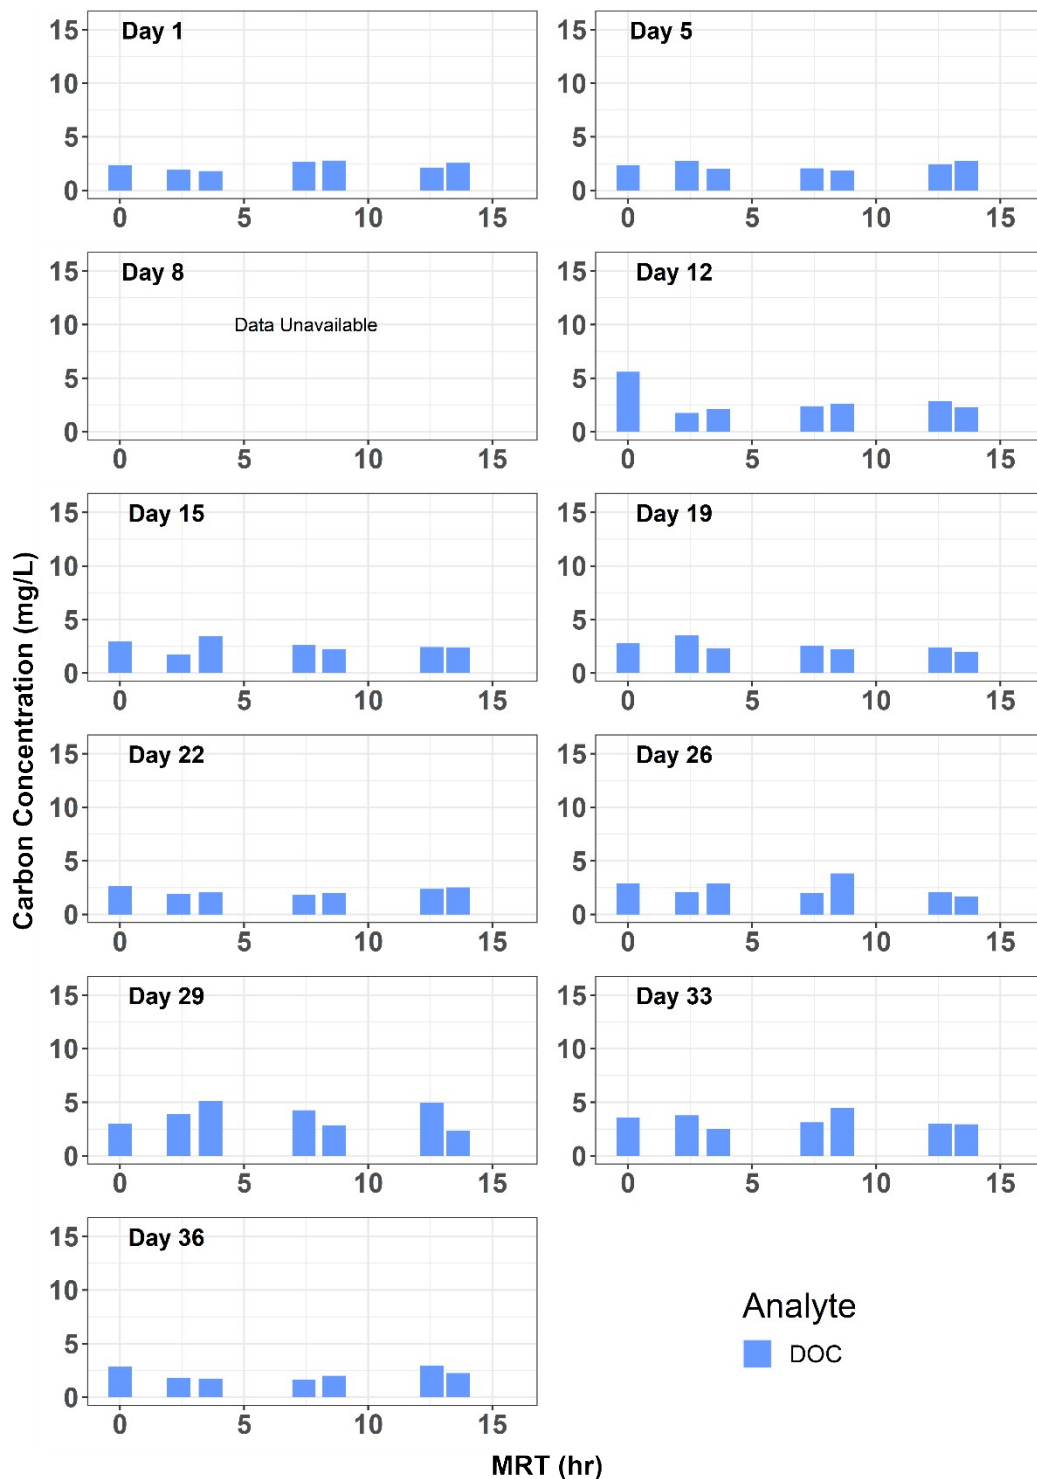

Figure S18: Profiles of dissolved organic carbon (DOC) in continuously saturated (CS) reactor from Experiment 1. Each bar represents a discrete water sampling port, with mean residence time (MRT) determined as length along the reactor/porewater velocity. Methane and dissolved inorganic carbon data were not available.

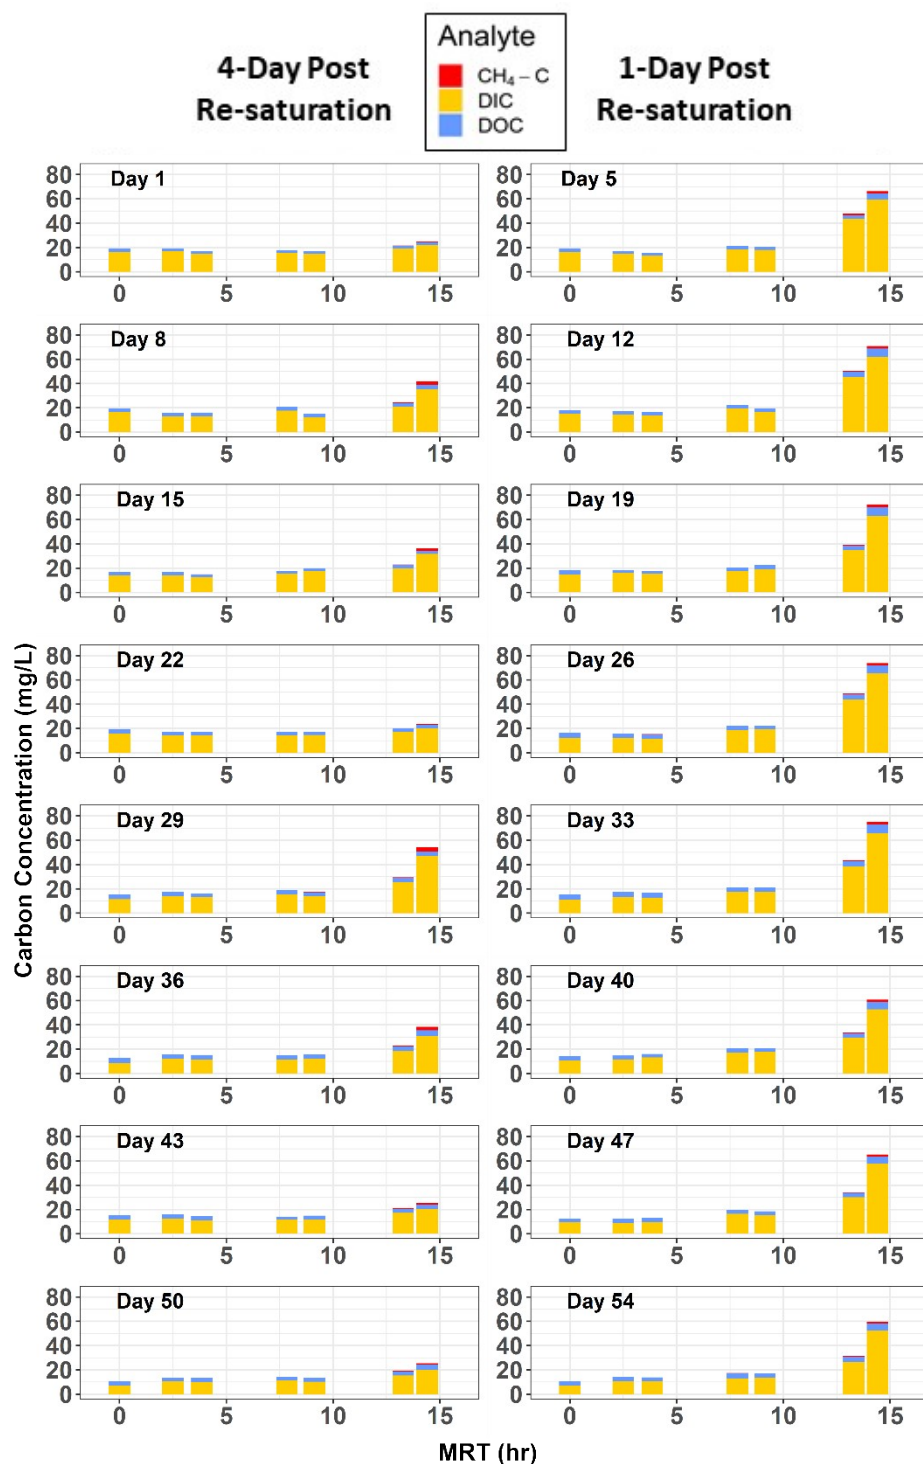

Figure S19: Profiles of methane ( $\text{CH}_4\text{-C}$ ), dissolved inorganic carbon (DIC), and dissolved organic carbon (DOC) in drying-rewetting (DRW) reactor from Experiment 2. Each bar represents a discrete water sampling port, with hydraulic residence time (HRT) determined as length along the reactor/porewater velocity. The left hand column represents 4 days post re-saturation and the right hand column represents 1 day post re-saturation.

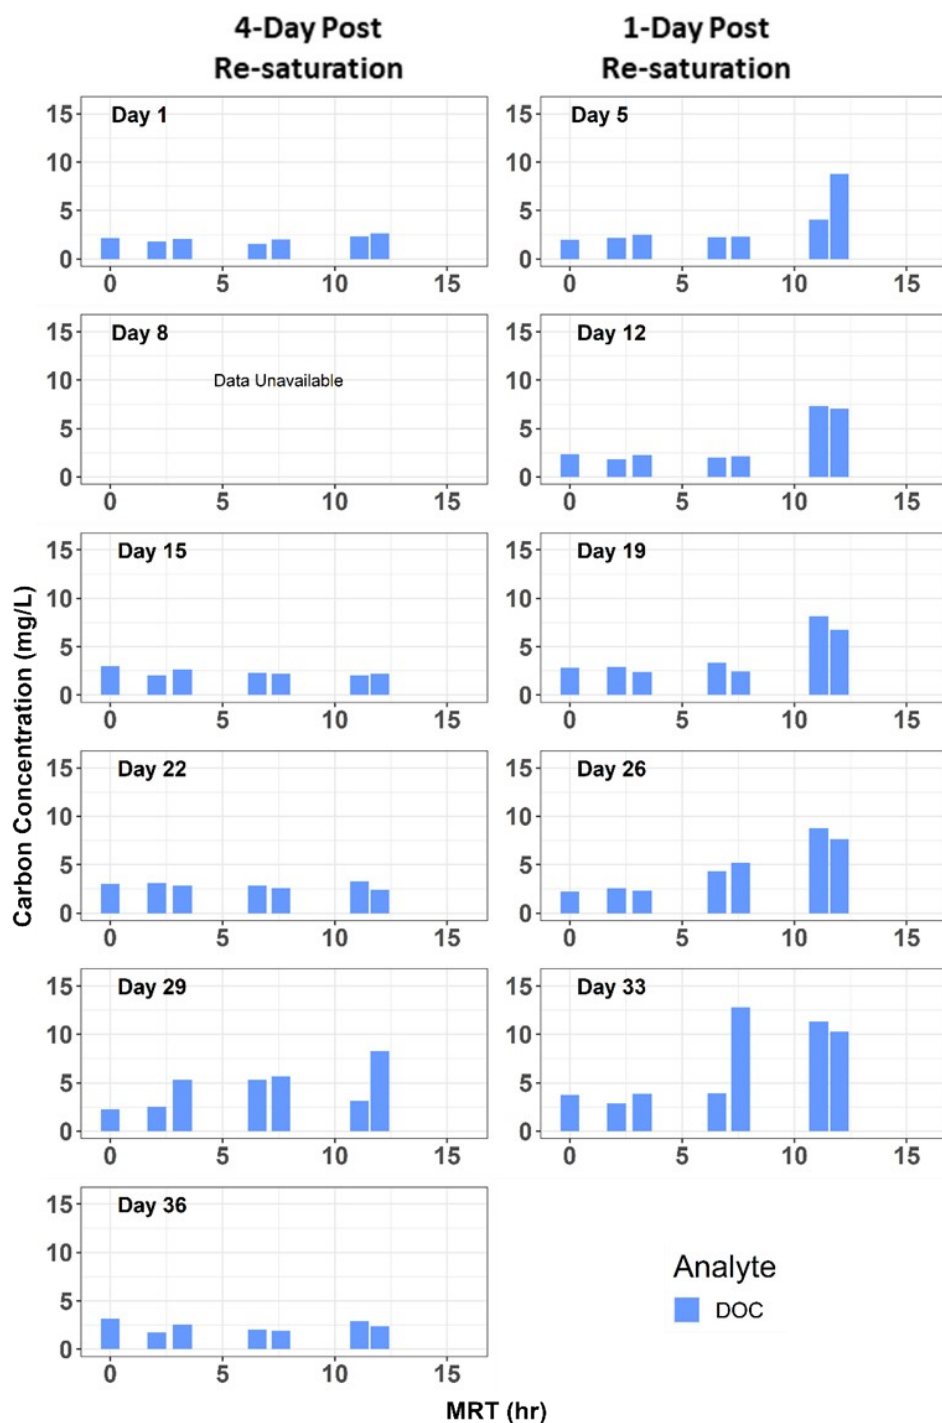

Figure S20: Profiles of dissolved organic carbon (DOC) in drying-rewetting (DRW) reactor from Experiment 1. Each bar represents a discrete water sampling port, with mean residence time (MRT) determined as length along the reactor/porewater velocity. Methane and dissolved inorganic carbon data were not available. The left hand column represents 4 days post re-saturation and the right hand column represents 1 day post re-saturation.

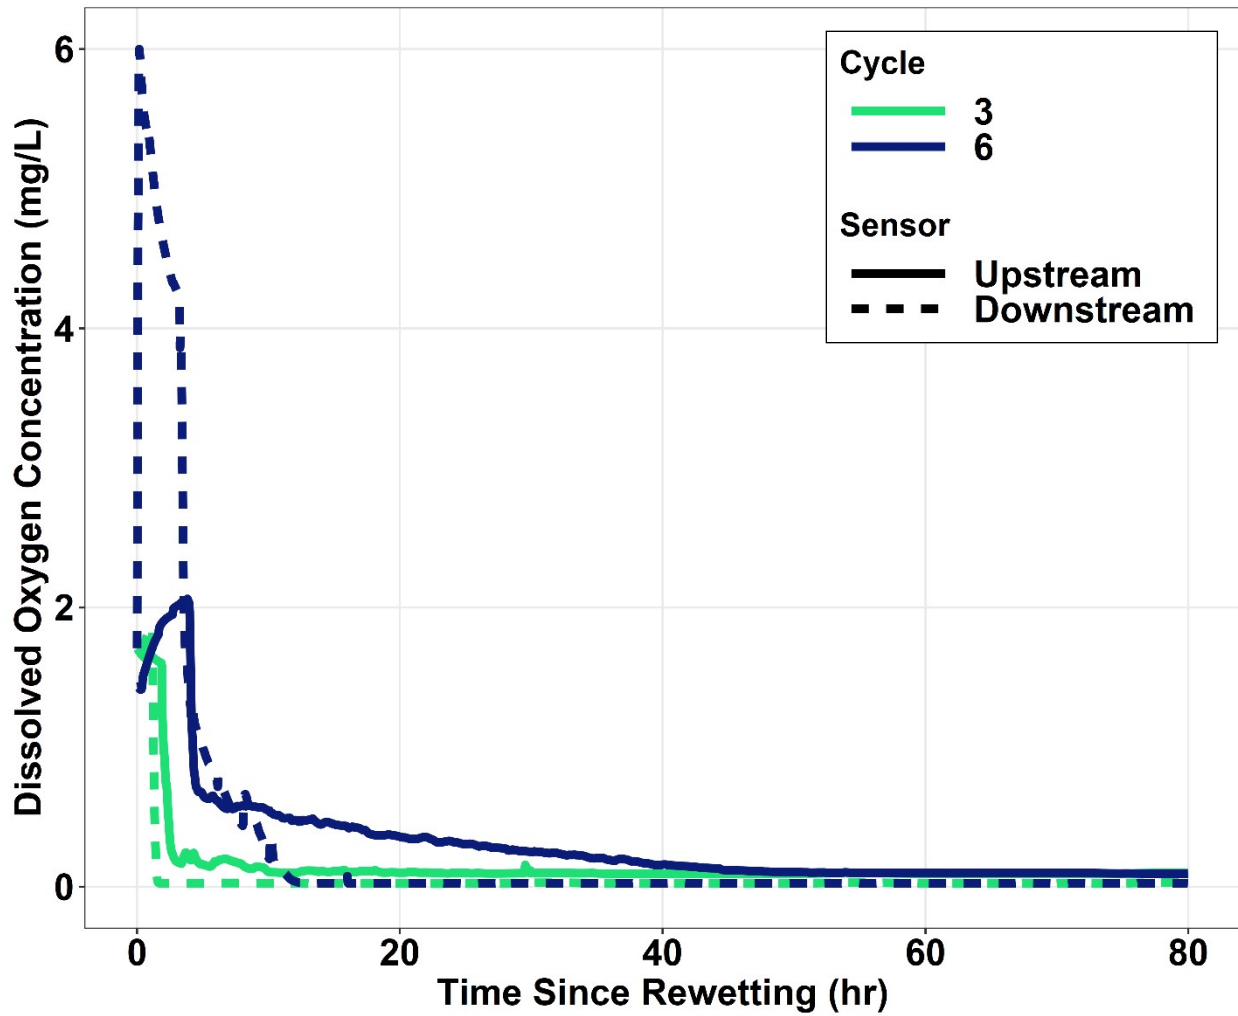

Figure S21: Extended duration dissolved oxygen concentrations of porewater immediately following rewetting during drying-rewetting Cycles 3 and 6.

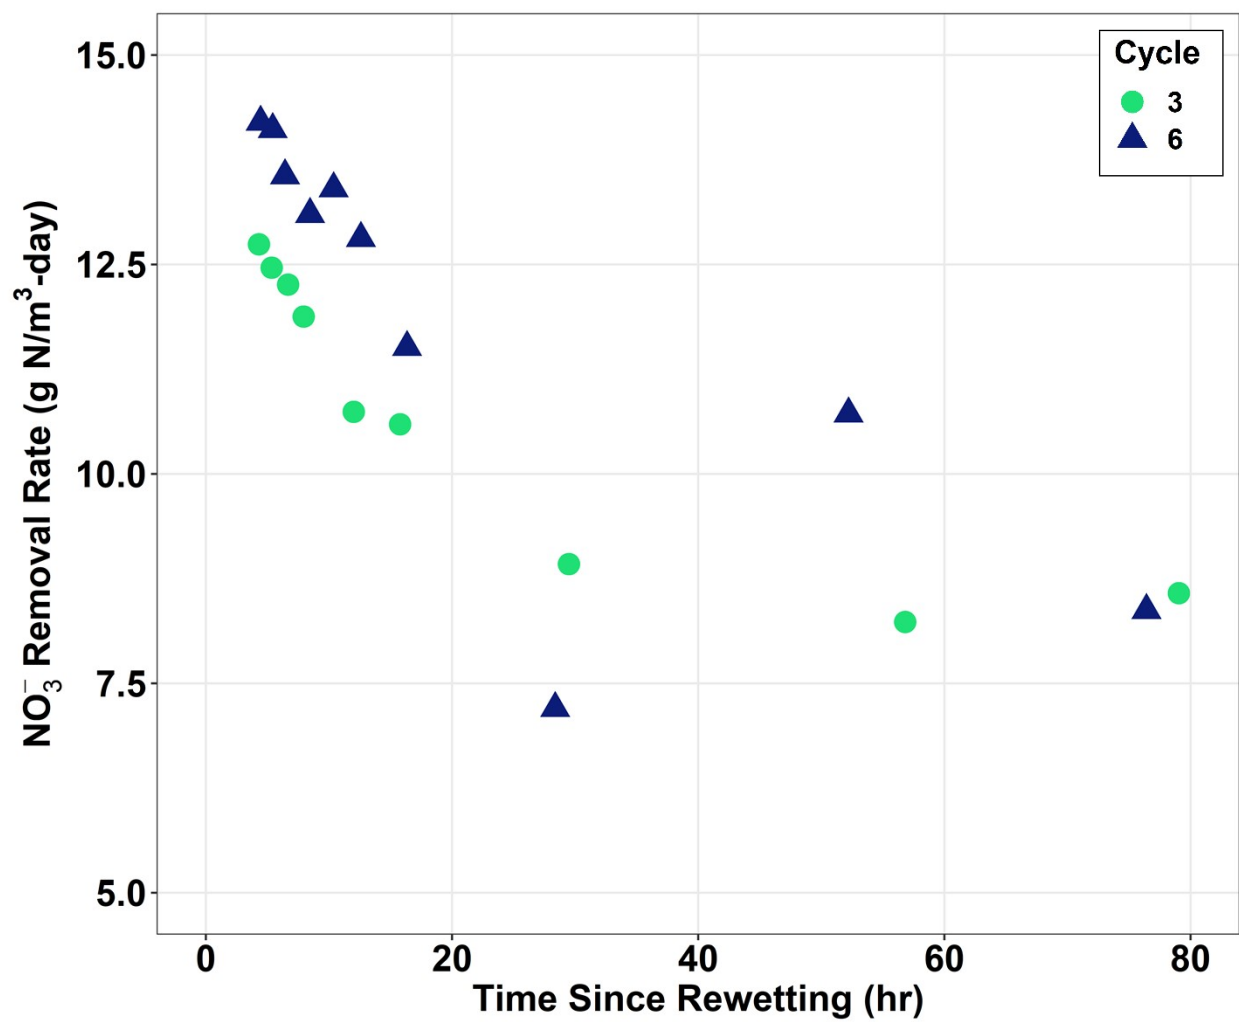

Figure S22: Extended duration nitrate removal rates in porewater immediately following rewetting during drying-rewetting Cycles 3 and 6.

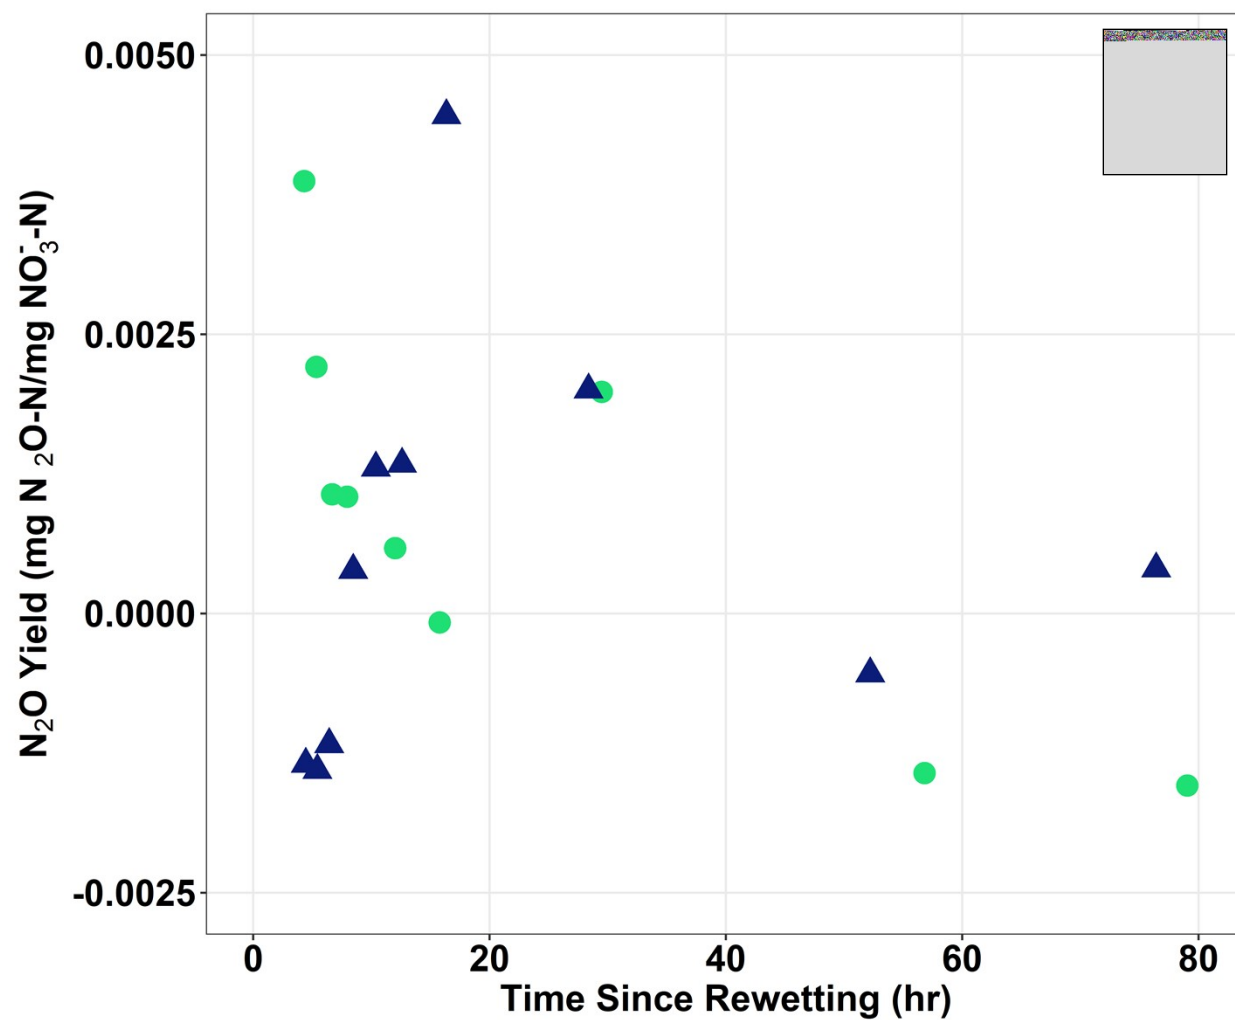

Figure S23: Extended duration nitrous oxide yields in porewater immediately following rewetting during drying-rewetting Cycles 3 and 6.

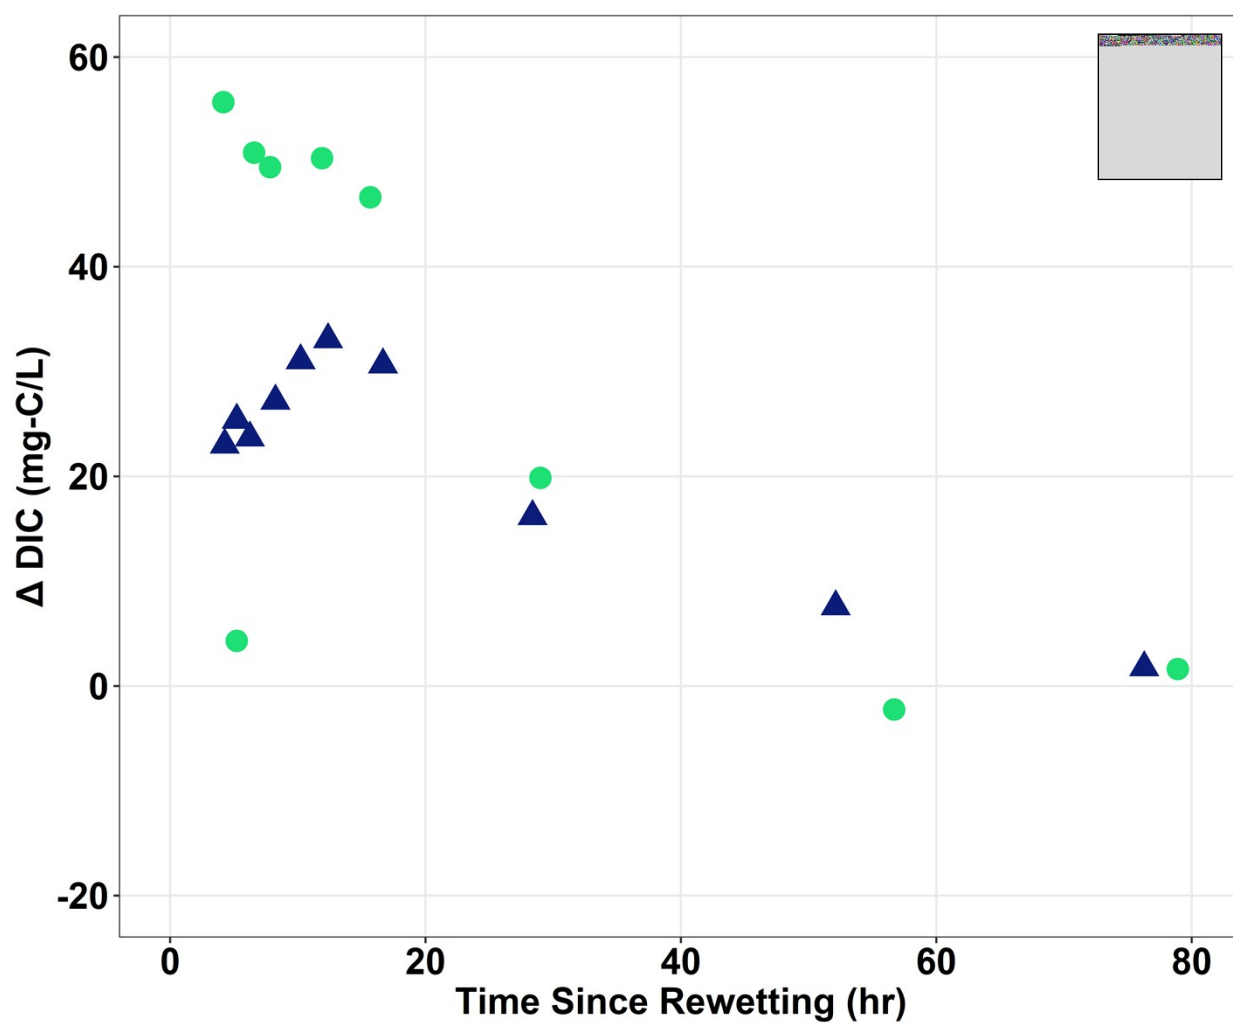

Figure S24: Extended duration of shifts in porewater dissolved inorganic carbon immediately following rewetting during drying-rewetting Cycles 3 and 6.

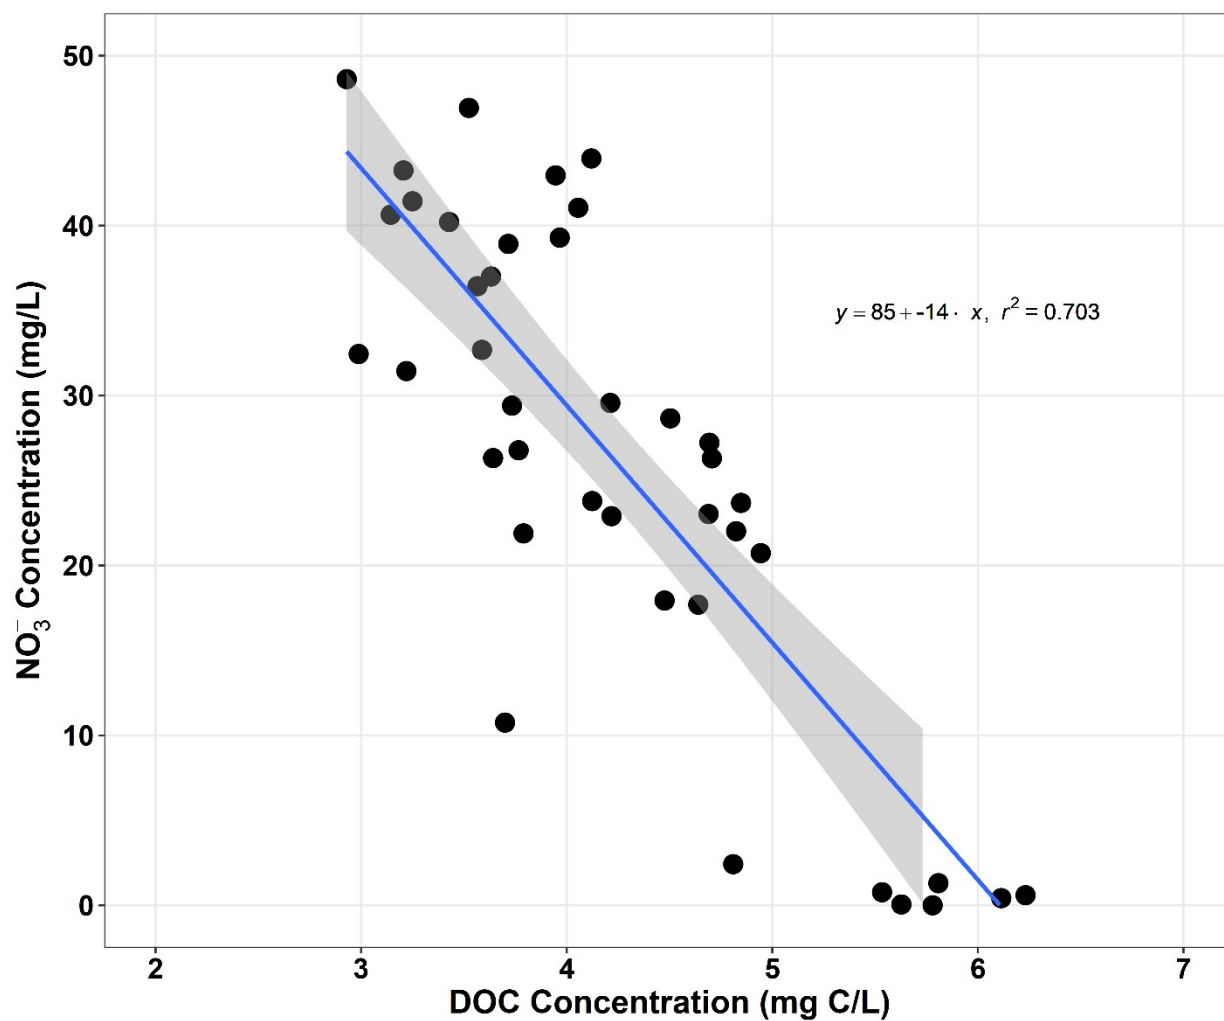

Figure S25: Correlation between nitrate (NO<sub>3</sub><sup>-</sup>) and dissolved organic carbon (DOC) porewater concentrations from high frequency sampling during Cycle 6 of Experiment 2. Trendline was generated using a linear model. The grey area represents the 95% confidence interval of the linear model.

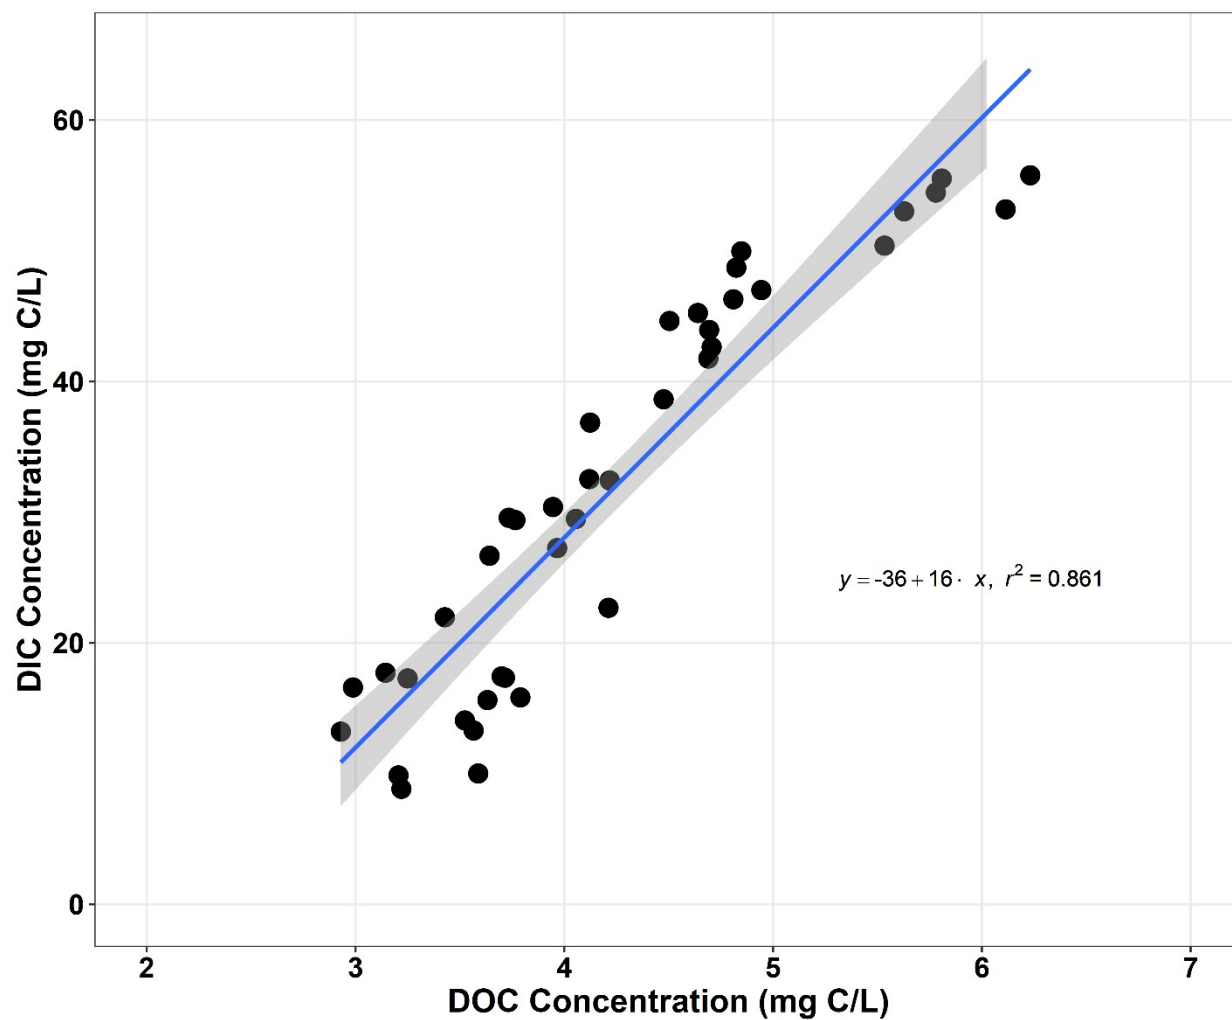

Figure S26: Correlation between dissolved inorganic carbon (DIC) and dissolved organic carbon (DOC) porewater concentrations from high frequency sampling during Cycle 6 of Experiment 2. Trendline was generated using a linear model. The grey area represents the 95% confidence interval of the linear model.

## High Frequency Carbon Chemistry Statistical Analysis

ANOVA assumptions of homogeneity of variance and normality were assessed via Levene's Test and Shapiro-Wilk Test, respectively. Analysis of both the DOC and  $\Delta$ DIC data determined that the assumption of homogeneity of variances was not violated, however the assumption of normality was violated, and a Kruskal-Wallis rank sum test was implemented. Results suggested a significant difference between the average DOC concentrations for the high frequency cycles ( $p < 0.001$ ), but not between the average  $\Delta$ DIC concentrations for the high frequency cycles ( $p = 0.064$ ). A post hoc Wilcoxon rank sum test was utilized for pairwise-comparisons of the average DOC by high frequency cycle. Data visualizations are available as Figures S31 and S32. A summary of resulting p-values is available as Table S2.

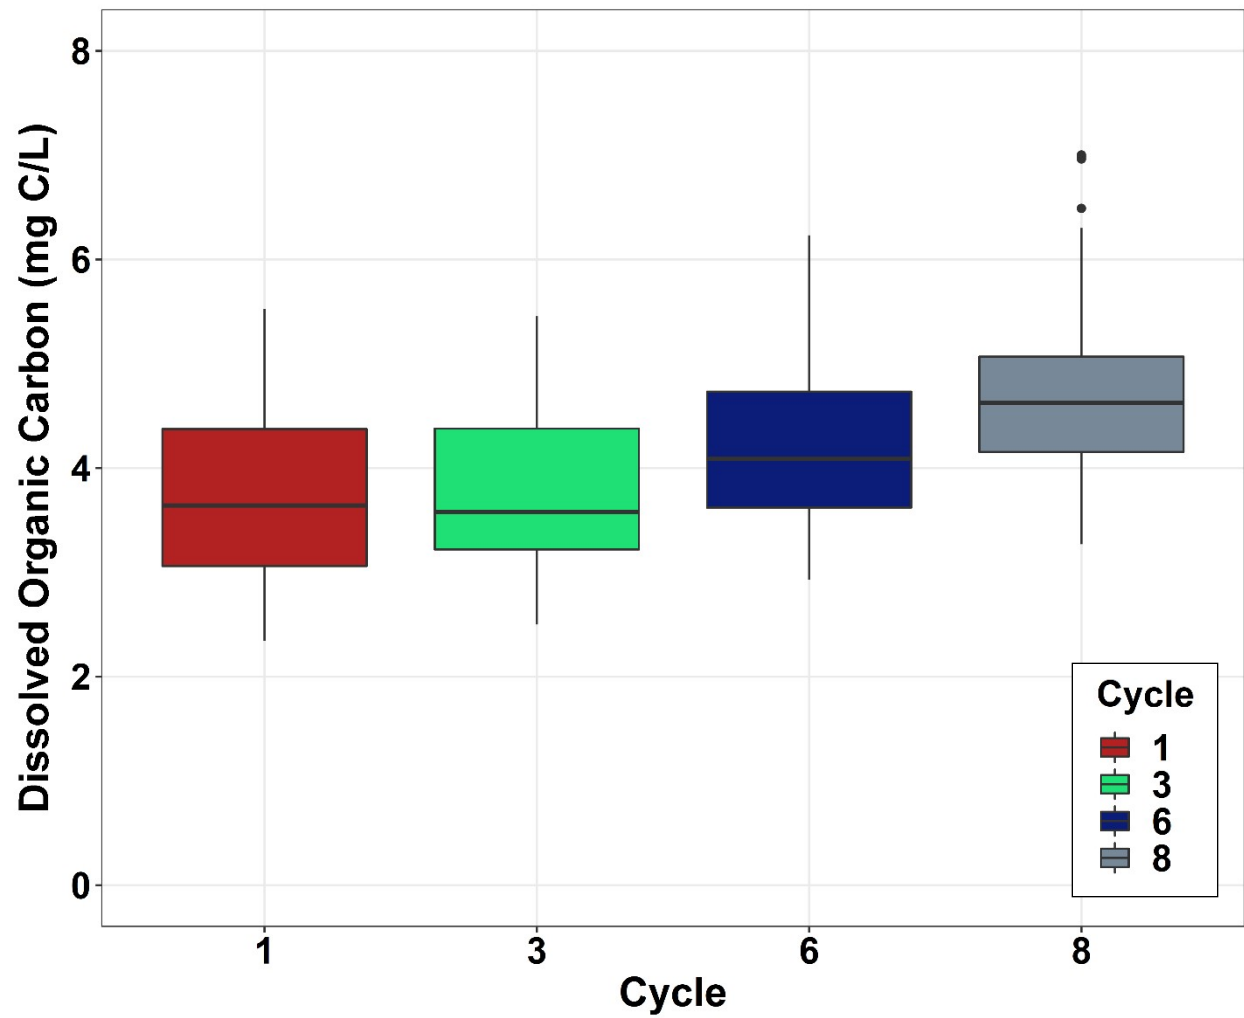

Figure S27: Dissolved organic carbon porewater concentrations during high frequency sampling events in Experiment 2.

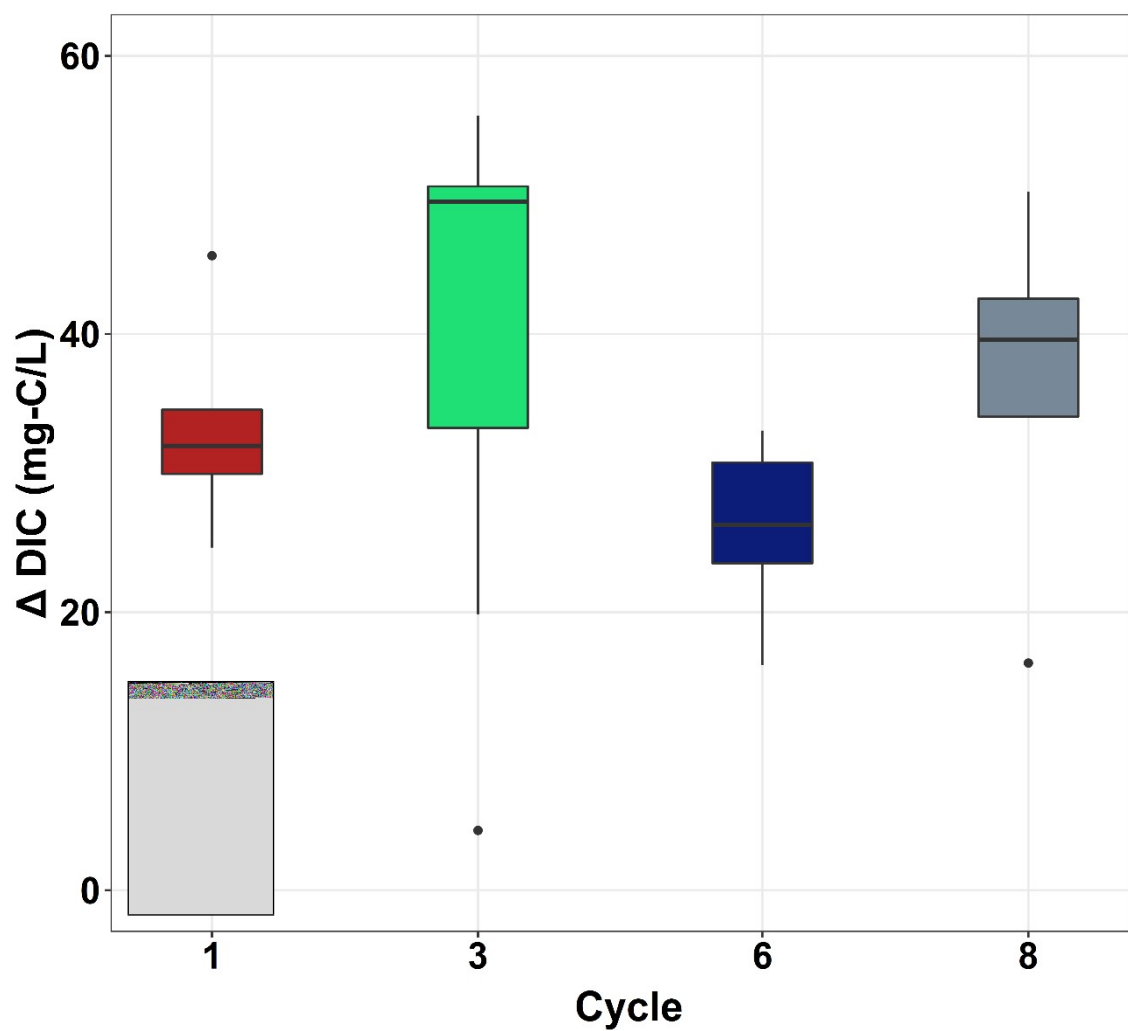

Figure S28: Shifts in dissolved inorganic carbon porewater concentrations during high frequency sampling events in Experiment 2.

**Table S3: High Frequency Carbon Chemistry Statistical Analysis – Reported p-values**

| Cycle Comparison | Examined Metric |
|------------------|-----------------|
|                  | DOC             |
| 1-3              | 0.792           |
| 1-6              | 0.039           |
| 1-8              | <0.001          |
| 3-6              | 0.057           |
| 3-8              | <0.001          |
| 6-8              | 0.031           |
